# Supplementary material for: Effects of artificially-simulated acidification on potential soil nitrification activity and ammonia oxidizing microbial communities in greenhouse conditions
Source: PeerJ. 2022 Oct 3;10:e14088. doi: 10.7717/peerj.14088 (PMC9536323; doi:10.7717/peerj.14088)
Supplement: Supplemental Information 5 [file peerj-10-14088-s005.xlsx]

## Sheet: Sheet1
	pH	TN	SOM	NH4+	NO3-	NH3
T1_1	6.91	3.37002	44.9325	3.28557	20.7627	12.8881
T1_2	6.91	3.47445	45.2728	3.51113	16.0735	15.1918
T1_3	6.96	3.51521	46.4781	3.63788	20.2381	18.8733
T2_1	6.4	3.27781	41.5614	3.45235	20.6548	5.25305
T2_2	6.46	3.3405	41.6325	3.6763	19.3222	5.9946
T2_3	6.49	3.4157	44.6673	4.22709	21.9048	7.88603
T3_1	5.91	3.05079	38.8858	3.5869	17.8188	1.71802
T3_2	5.94	3.0883	41.3811	4.61544	18.8024	2.26238
T3_3	5.94	3.20557	45.4335	5.00685	20.0118	2.28672
T4_1	5.3	2.85086	34.8359	12.2559	25	1.45661
T4_2	5.32	2.96932	35.9541	14.918	27.5572	1.69321
T4_3	5.36	3.03379	37.0268	15.9683	21.7105	1.73084
T5_1	4.2	2.7215	32.8865	16.7675	11.7473	0.139685
T5_2	4.21	2.85153	34.1887	19.8782	8.33333	0.151171
T5_3	4.22	2.92417	35.627	20.4245	9.23451	0.201029
