# Supplementary material for: Effects of artificially-simulated acidification on potential soil nitrification activity and ammonia oxidizing microbial communities in greenhouse conditions
Source: PeerJ. 2022 Oct 3;10:e14088. doi: 10.7717/peerj.14088 (PMC9536323; doi:10.7717/peerj.14088)
Supplement: Supplemental Information 6 [file peerj-10-14088-s006.xlsx]

## Sheet: Sheet1
	urease	protease	MBN	MBC
T1_1	13.2731	0.440347	33.74	289.384
T1_2	13.4189	0.450645	39.4594	305.577
T1_3	14.4343	0.482028	29.4976	297.481
T2_1	12.3762	0.410435	40.02	323.924
T2_2	12.8696	0.460452	42.1113	395.802
T2_3	14.7628	0.499681	37.9201	157.456
T3_1	11.2694	0.40406	36.3434	397.03
T3_2	12.1963	0.425146	33.8282	390.994
T3_3	13.4625	0.436424	37.204	403.057
T4_1	9.38846	0.192713	45.3718	462.679
T4_2	10.3835	0.204972	39.9909	416.547
T4_3	10.4175	0.216251	25.8911	410.968
T5_1	7.17083	0.0657088	9.16892	128.766
T5_2	7.33439	0.0701221	15.96	185.305
T5_3	7.88096	0.095621	22.755	157.04
