# Supplementary material for: Effects of artificially-simulated acidification on potential soil nitrification activity and ammonia oxidizing microbial communities in greenhouse conditions
Source: PeerJ. 2022 Oct 3;10:e14088. doi: 10.7717/peerj.14088 (PMC9536323; doi:10.7717/peerj.14088)
Supplement: Supplemental Information 7 [file peerj-10-14088-s007.xlsx]

## Sheet: Sheet1
	Ammonia oxidation linear relationship
	2H	4H	6H	8H	10H	PNA
T1_1	4.19693	7.68849	10.0162	15.6591	19.3623	1.9
T1_2	3.00931	6.7621	10.4441	13.5596	17.7726	1.85
T1_3	2.28925	6.97504	12.9843	14.6655	18.4213	2.02
T2_1	5.02732	12.7099	16.2503	19.8261	22.2689	2.22
T2_2	4.33032	10.8613	15.866	20.0189	22.61	2.28
T2_3	4.38445	9.33463	14.1434	17.6439	24.0437	2.46
T3_1	3.38499	7.08803	12.159	13.8606	15.1722	1.47
T3_2	3.42944	6.85888	10.9745	13.1836	15.4744	1.51
T3_3	3.48783	8.42891	10.7022	13.1585	15.0395	1.45
T4_1	1.03198	2.34206	3.18101	3.11596	3.49561	0.31
T4_2	1.64752	3.70097	3.38064	3.06037	5.2649	0.45
T4_3	0.996399	2.27	3.40249	5.18862	3.45181	0.31
T5_1	1.23913	1.13292	1.02671	1.55776	3.43416	0.27
T5_2	1.59234	2.09899	2.02661	1.70091	3.58276	0.25
T5_3	0.21134	0.986254	1.72595	1.64086	2.32474	0.26
