# Supplementary material for: Effects of artificially-simulated acidification on potential soil nitrification activity and ammonia oxidizing microbial communities in greenhouse conditions
Source: PeerJ. 2022 Oct 3;10:e14088. doi: 10.7717/peerj.14088 (PMC9536323; doi:10.7717/peerj.14088)
Supplement: Supplemental Information 8 [file peerj-10-14088-s008.xlsx]

## Sheet: Sheet1
	Yield	Plant height	Stem diamter	Aboveground biomass	Underground biomass	Total biaomass
T1_1	1.9465	157	1.1	182.736	4.62	187.626
T1_2	1.9949	158	1.2	188.749	4.89	194.489
T1_3	2.0024	160	0.93	197.061	5.74	201.681
T2_1	1.8929	166	1.14	193.079	8.04	201.979
T2_2	2.0028	166	1.1	205.012	8.85	212.102
T2_3	2.0303	163	1.1	207.671	8.9	215.711
T3_1	2.083	162	1.23	207.587	6.62	213.367
T3_2	2.1009	163	1.16	212.735	7.1	219.355
T3_3	2.1937	163	1.2	220.137	10.65	230.787
T4_1	1.9418	176	1.24	237.174	6.71	246.664
T4_2	2.163	163	1.4	241.767	7.97	249.737
T4_3	2.188	160	1.1	247.366	9.49	253.906
T5_1	1.5988	163	1.2	169.858	3.56	173.418
T5_2	1.6	164	1.08	176.816	3.64	180.676
T5_3	1.678	166	1.22	173.337	3.86	177.047
